# Supplementary material for: Obstetric and perinatal outcomes of dizygotic twin pregnancies resulting from in vitro fertilization versus spontaneous conception: a retrospective study
Source: PeerJ. 2019 Apr 1;7:e6638. doi: 10.7717/peerj.6638 (PMC6448552; doi:10.7717/peerj.6638)
Supplement: Supplemental Information 1 [file peerj-07-6638-s001.xls]

## Sheet: IVF twin pregnacy
inpatient number	mean age	gestational weeks	day	gestational age	Cesarean section	Repeated Cesarean Section	Length of hospitalization	premature rupture of fetal membrane	hypertensive disorder	gestational diabetes mellitus	polyhydramnios	intrahepatic cholestasis of pregnancies	stillbirth and malformation	maternal anemia	postpartum hemorrhage	Low birth weight	primiparity	placental accreta	placenta previa	growth discordance	bith weight	bith weight	low1	low2			NICU admission				neonatal asphyxia				inpatient number
441059	32	32	0.857143	32.8571	1	0	8	1						1		2	1		1		1980	2180	1	1	2	1	1	1	2	1	0	0	0	0	441059
00595024	29	35	0	35		0	4								1	1	1	1		1	1460	2190	1	1	2	1	1	1	2	1	1	1	2	1	00595024
897357	33	37	0.142857	37.1429	1	0	6			1						1	1				2590	2370	0	1	1	1	0	0	0	0	1	0	1	1	897357
834506	33	37	0.428571	37.4286	1	0	6						1			1	1				1930	2810	1	0	1	1	1	0	1	1	1	0	1	1	834506
847602	33	38	0.428571	38.4286	1	0	5			1						1	0				2450	3000	1	0	1	1	0	0	0	0	1	0	1	1	847602
818929	32	33	0.285714	33.2857	1	1	3							1	1	1	0			1	2100	1020	1	1	2	1	1	1	2	1	1	0	1	1	818929
00866556	28	29	0.857143	29.8571	1	1	5							1			0				1280	1420	1	1	2	1	1	1	2	1	1	0	1	1	00866556
859412	25	32	0.142857	32.1429		0	3							1			1				1590	1510	1	1	2	1	1	1	2	1	1	0	1	1	859412
977931	29	30	0.142857	30.1429		0	8							1	1	1	1				1400	1570	1	1	2	1	1	1	2	1	1	0	1	1	977931
00515947	25	30	0.714286	30.7143		0	3									2	1				1565	1600	1	1	2	1	1	1	2	1	1	0	1	1	00515947
442619	28	31	0.142857	31.1429	1	0	4	1		1		1		1		2	1				1970	1740	1	1	2	1	1	1	2	1	1	0	1	1	442619
921972	36	33	0.285714	33.2857	1	0	14	1			1		1			2	1				1770	1960	1	1	2	1	1	0	1	1	1	0	1	1	921972
849241	34	32	0.714286	32.7143	1	0	5				1			1		2	1				1880	2030	1	1	2	1	1	1	2	1	1	0	1	1	849241
996540	26	34	0.142857	34.1429		0	5			1			1	1	1	2	1				1800	2200	1	1	2	1	1	1	2	1	1	0	1	1	996540
00518329	29	35	0.714286	35.7143	1	0	10							1		2	1				2405	2460	1	1	2	1	1	0	1	1	1	0	1	1	00518329
992849	32	35	0.857143	35.8571	1	0	11		1					1			1				2500	2500	0	0	0	0	0	0	0	0	0	0	0	0	992849
1025594	34	37	0.285714	37.2857	1	0	5			1				1			0				2620	2500	0	0	0	0	0	0	0	0	0	0	0	0	1025594
00779794	31	36	0.428571	36.4286	1	0	7				1			1			1				2660	2500	0	0	0	0	0	0	0	0	0	0	0	0	00779794
504732	30	36	0.142857	36.1429	1	0	14			1				1	1		1				3100	2500	0	0	0	0	0	0	0	0	0	0	0	0	504732
924089	37	36	0.714286	36.7143	1	0	10								1		1				2710	2510	0	0	0	0	0	0	0	0	0	0	0	0	924089
706676	25	35	0.428571	35.4286	1	0	6										0				2910	2515	0	0	0	0	0	0	0	0	0	0	0	0	706676
722640	32	37	0.285714	37.2857	1	0	12			1				1			1	1			3290	2520	0	0	0	0	1	1	2	1	0	0	0	0	722640
1004704	28	35	0.285714	35.2857	1	0	4							1			1				2680	2530	0	0	0	0	0	0	0	0	0	0	0	0	1004704
805954	38	37	0.571429	37.5714	1	0	4										1				2820	2530	0	0	0	0	0	0	0	0	0	0	0	0	805954
855783	37	36	0.142857	36.1429	1	0	5							1			1				2530	2540	0	0	0	0	0	0	0	0	0	0	0	0	855783
935968	30	37	0.857143	37.8571	1	0	5			1				1			1				2600	2550	0	0	0	0	0	0	0	0	0	0	0	0	935968
00851069	35	36	0.571429	36.5714	1	0	3										0				2840	2550	0	0	0	0	0	0	0	0	0	0	0	0	00851069
748992	30	37	0.142857	37.1429	1	0	5										1				2820	2570	0	0	0	0	0	0	0	0	0	0	0	0	748992
00715824	28	36	0.714286	36.7143	1	0	7										1				2505	2580	0	0	0	0	0	0	0	0	0	0	0	0	00715824
00854193	27	36	0.428571	36.4286	1	0	8							1			1				2830	2590	0	0	0	0	0	0	0	0	0	0	0	0	00854193
00449359	24	36	0.857143	36.8571	1	0	4							1			1				3240	2590	0	0	0	0	0	0	0	0	0	0	0	0	00449359
00517358	33	36	0.428571	36.4286	1	0	5										1				2870	2595	0	0	0	0	0	0	0	0	0	0	0	0	00517358
735376	30	36	0.142857	36.1429	1	0	6					1					0				2975	2595	0	0	0	0	0	0	0	0	0	0	0	0	735376
996584	33	36	0.142857	36.1429	1	0	4	1		1				1			1	1	1		2640	2600	0	0	0	0	0	0	0	0	0	0	0	0	996584
757880	23	36	0.571429	36.5714	1	0	10		1					1			1				2815	2607	0	0	0	0	0	0	0	0	0	0	0	0	757880
812528	30	36	0.428571	36.4286	1	1	5							1			0				2645	2610	0	0	0	0	0	0	0	0	0	0	0	0	812528
859389	31	36	0.428571	36.4286	1	0	3	1									1				2800	2610	0	0	0	0	0	0	0	0	0	0	0	0	859389
1029609	30	37	0.142857	37.1429	1	0	8							1			1				2970	2620	0	0	0	0	0	0	0	0	0	0	0	0	1029609
00525174	31	36	0.714286	36.7143	1	0	7										1				3060	2620	0	0	0	0	0	0	0	0	0	0	0	0	00525174
735374	24	37	0.142857	37.1429	1	0	5							1			1				3000	2630	0	0	0	0	0	0	0	0	0	0	0	0	735374
541118	34	37	0.142857	37.1429	1	0	6							1			1				2640	2640	0	0	0	0	0	0	0	0	0	0	0	0	541118
00730381	31	36	0.857143	36.8571	1	0	5										1				2770	2640	0	0	0	0	0	0	0	0	0	0	0	0	00730381
524410	28	37	0.428571	37.4286	1	0	3							1			1				3250	2640	0	0	0	0	0	0	0	0	0	0	0	0	524410
660107	32	36	0.428571	36.4286	1	0	14			1							1				2775	2650	0	0	0	0	0	0	0	0	0	0	0	0	660107
1000069	36	36	0.571429	36.5714	1	0	4										0				2540	2660	0	0	0	0	1	0	1	1	0	0	0	0	1000069
701367	33	35	0.714286	35.7143	1	0	21							1			0				2745	2665	0	0	0	0	0	0	0	0	0	0	0	0	701367
00912850	37	37	0.571429	37.5714	1	0	6	1		1							1				3140	2670	0	0	0	0	0	0	0	0	0	0	0	0	00912850
970745	29	37	0.142857	37.1429	1	0	5										1				2650	2680	0	0	0	0	0	1	1	1	0	0	0	0	970745
00531528	25	35	0.857143	35.8571	1	0	15							1			1				2990	2680	0	0	0	0	0	0	0	0	0	0	0	0	00531528
00843509	30	37	0.142857	37.1429	1	0	5			1							1				2790	2690	0	0	0	0	0	0	0	0	0	0	0	0	00843509
877785	28	36	0.857143	36.8571	1	0	9										1				2850	2690	0	0	0	0	0	0	0	0	0	0	0	0	877785
836389	32	37	0.285714	37.2857	1	1	4										0				2570	2700	0	0	0	0	0	0	0	0	0	0	0	0	836389
1025074	26	37	0.285714	37.2857	1	0	8			1				1	1		1				3070	2701	0	0	0	0	0	0	0	0	0	0	0	0	1025074
889069	24	36	0	36	1	0	4							1			1				2800	2720	0	0	0	0	0	0	0	0	0	0	0	0	889069
1037533	30	37	0.571429	37.5714	1	0	4			1							1				2940	2730	0	0	0	0	1	0	1	1	0	0	0	0	1037533
00967101	29	36	0.571429	36.5714	1	0	2							1			1				2530	2750	0	0	0	0	1	0	1	1	0	0	0	0	00967101
838213	28	38	0.142857	38.1429	1	0	6							1	1		1				2910	2750	0	0	0	0	0	0	0	0	0	0	0	0	838213
00828997	32	37	0	37	1	0	4			1							1				2600	2760	0	0	0	0	0	0	0	0	0	0	0	0	00828997
637765	31	37	0.428571	37.4286	1	0	8										1				2995	2760	0	0	0	0	0	0	0	0	0	0	0	0	637765
560629	37	38	0.571429	38.5714		0	2	1						1	1		0				3145	2765	0	0	0	0	1	0	1	1	0	0	0	0	560629
00592851	31	35	0.714286	35.7143	1	0	4					1					1				2520	2775	0	0	0	0	0	1	1	1	0	0	0	0	00592851
00934502	33	38	0	38	1	0	7			1							1				2570	2780	0	0	0	0	0	0	0	0	0	0	0	0	00934502
1016889	28	36	0.714286	36.7143	1	0	7							1			1				2710	2780	0	0	0	0	0	0	0	0	0	0	0	0	1016889
1021758	32	37	0.428571	37.4286	1	0	6										1				2780	2780	0	0	0	0	0	0	0	0	0	0	0	0	1021758
483449	38	37	0.571429	37.5714	1	0	11			1				1			1				3025	2785	0	0	0	0	0	0	0	0	0	0	0	0	483449
895704	40	36	0.857143	36.8571	1	0	9			1							1				2590	2790	0	0	0	0	1	0	1	1	0	0	0	0	895704
00616189	29	36	0.714286	36.7143	1	0	8							1			1				2570	2800	0	0	0	0	0	0	0	0	0	0	0	0	00616189
515454	32	36	0.571429	36.5714	1	0	8							1			1				3100	2800	0	0	0	0	0	0	0	0	0	0	0	0	515454
00465794	27	37	0	37	1	0	5							1			1				2720	2820	0	0	0	0	0	0	0	0	0	0	0	0	00465794
00548230	34	36	0.142857	36.1429	1	0	7						1	1			1				2600	2825	0	0	0	0	0	0	0	0	0	0	0	0	00548230
698424	35	36	0.142857	36.1429	1	0	5							1			1				2865	2835	0	0	0	0	0	0	0	0	0	0	0	0	698424
927641	25	36	0.714286	36.7143	1	0	6						1	1	1		1				2610	2840	0	0	0	0	0	0	0	0	0	0	0	0	927641
00995193	38	36	0.714286	36.7143	1	0	22			1							0				2680	2840	0	0	0	0	0	0	0	0	0	0	0	0	00995193
00827025	32	37	0.428571	37.4286	1	0	6			1							1				2650	2850	0	0	0	0	0	0	0	0	0	0	0	0	00827025
510628	32	37	0.285714	37.2857	1	0	9		1	1				1	1		1				2750	2860	0	0	0	0	0	0	0	0	0	0	0	0	510628
766894	28	36	0.857143	36.8571	1	0	6							1			1				2970	2860	0	0	0	0	0	0	0	0	0	0	0	0	766894
00885739	28	37	0.428571	37.4286	1	0	4										1				2950	2880	0	0	0	0	0	0	0	0	0	0	0	0	00885739
976678	31	38	0	38	1	0	16							1			1				2720	2900	0	0	0	0	1	0	1	1	0	0	0	0	976678
905751	27	37	0.428571	37.4286	1	0	5							1			1				2720	2910	0	0	0	0	0	0	0	0	0	0	0	0	905751
953642	34	35	0	35	1	0	11			1							1				2580	2930	0	0	0	0	0	0	0	0	0	0	0	0	953642
909128	32	37	0	37	1	0	5			1							1				2520	2940	0	0	0	0	0	0	0	0	0	0	0	0	909128
1029081	28	37	0.285714	37.2857	1	0	4										1				2620	2950	0	0	0	0	0	0	0	0	0	0	0	0	1029081
826994	31	37	0.142857	37.1429	1	0	6										1				2940	2960	0	0	0	0	0	0	0	0	0	0	0	0	826994
895694	32	37	0.285714	37.2857	1	0	9							1			1				2900	2970	0	0	0	0	0	0	0	0	0	0	0	0	895694
00683744	27	37	0	37	1	0	7							1			1				3135	2975	0	0	0	0	0	0	0	0	0	0	0	0	00683744
578713	32	37	0.285714	37.2857	1	0	7		1	1				1			0				3850	2975	0	0	0	0	0	0	0	0	0	0	0	0	578713
553986	30	36	0.571429	36.5714	1	0	7							1			1	1			2635	2995	0	0	0	0	0	0	0	0	0	0	0	0	553986
00607173	34	36	0.142857	36.1429	1	0	5							1			1				3165	3000	0	0	0	0	0	0	0	0	0	0	0	0	00607173
00776097	35	37	0.142857	37.1429	1	0	4							1			1				2710	3005	0	0	0	0	0	0	0	0	0	0	0	0	00776097
868548	32	36	0.142857	36.1429	1	0	5							1		2	1				2620	3010	0	0	0	0	0	0	0	0	0	0	0	0	868548
573173	28	37	0	37	1	0	6							1			1				3180	3010	0	0	0	0	0	0	0	0	0	0	0	0	573173
632565	26	37	0.857143	37.8571	1	0	7										1				2830	3040	0	0	0	0	0	0	0	0	0	0	0	0	632565
716271	39	37	0	37	1	0	14		1		1			1			0				3110	3060	0	0	0	0	0	0	0	0	0	0	0	0	716271
875131	27	38	0	38	1	0	8							1			1				2670	3070	0	0	0	0	0	0	0	0	0	0	0	0	875131
978158	34	37	0.142857	37.1429	1	0	5								1		1		1		2640	3080	0	0	0	0	0	0	0	0	0	0	0	0	978158
985830	30	37	0.714286	37.7143	1	0	9							1			1				2730	3120	0	0	0	0	0	0	0	0	0	0	0	0	985830
00850684	25	36	0.714286	36.7143	1	0	9							1	1		1		1		3190	3120	0	0	0	0	0	0	0	0	0	0	0	0	00850684
00836360	27	37	0	37	1	0	5										1				2640	3140	0	0	0	0	0	0	0	0	0	0	0	0	00836360
701417	26	37	0.142857	37.1429	1	0	9							1			1				3060	3140	0	0	0	0	0	0	0	0	0	0	0	0	701417
630152	36	37	0.142857	37.1429	1	0	8				1			1			1				3575	3150	0	0	0	0	0	0	0	0	0	0	0	0	630152
656363	32	37	0.142857	37.1429	1	0	5			1				1			1				2795	3170	0	0	0	0	0	0	0	0	0	0	0	0	656363
1037719	29	37	0.428571	37.4286	1	0	5										1				2930	3170	0	0	0	0	0	0	0	0	0	0	0	0	1037719
980220	24	35	0.428571	35.4286	1	0	17		1					1			1				2750	3200	0	0	0	0	0	0	0	0	0	0	0	0	980220
984126	28	37	0.571429	37.5714	1	0	5							1			0				2990	3500	0	0	0	0	0	0	0	0	0	0	0	0	984126
525410	26	37	0.428571	37.4286	1	0	5			1		1	1	1			1				3115	3580	0	0	0	0	0	0	0	0	0	0	0	0	525410
580811	33	36	0.857143	36.8571	1	0	6		1				1	1			1				2640		0	0	0	0	0	0	0	0	0	0	0	0	580811
00839946	30	37	0.857143	37.8571	1	0	6			1			1				0				3290		0	0	0	0	0	0	0	0	0	0	0	0	00839946
536323	32	37	0.571429	37.5714	1	0	8									1	1			1	2965	1990	0	1	1	1	0	0	0	0	0	0	0	0	536323
872531	31	35	0.857143	35.8571	1	0	14							1		1	1				2560	2010	0	1	1	1	0	0	0	0	0	0	0	0	872531
930074	31	34	0.571429	34.5714	1	0	15									1	1				2690	2020	0	1	1	1	1	1	2	1	0	0	0	0	930074
831199	26	36	0.428571	36.4286	1	0	5			1						1	1				2610	2070	0	1	1	1	0	0	0	0	0	0	0	0	831199
929711	25	37	0.285714	37.2857	1	0	8							1		1	1			1	2670	2090	0	1	1	1	0	0	0	0	0	0	0	0	929711
595711	31	36	0	36	1	1	4							1		1	0				2520	2135	0	1	1	1	0	0	0	0	0	0	0	0	595711
1024810	26	37	0.285714	37.2857	1	0	8									1	1				2540	2140	0	1	1	1	0	0	0	0	0	0	0	0	1024810
00723725	35	37	0	37	1	0	3							1		1	1			1	2950	2150	0	1	1	1	0	0	0	0	0	0	0	0	00723725
930461	31	37	0.142857	37.1429	1	0	5									1	1				2600	2160	0	1	1	1	0	0	0	0	0	0	0	0	930461
869974	45	36	0.285714	36.2857	1	0	22		1	1				1		1	1				2610	2190	0	1	1	1	0	0	0	0	0	0	0	0	869974
00624337	31	35	0.428571	35.4286	1	0	7				1			1		1	0			1	3105	2260	0	1	1	1	0	0	0	0	0	0	0	0	00624337
514211	28	36	0.285714	36.2857	1	0	5		1					1		1	1				2610	2290	0	1	1	1	0	0	0	0	0	0	0	0	514211
590749	27	36	0.857143	36.8571	1	0	4			1						1	1				2830	2290	0	1	1	1	0	0	0	0	0	0	0	0	590749
00709777	32	37	0.428571	37.4286	1	0	36							1		1	1			1	3315	2290	0	1	1	1	0	0	0	0	0	0	0	0	00709777
00538275	26	38	0.714286	38.7143	1	0	8							1		1	1				2565	2300	0	1	1	1	0	0	0	0	0	0	0	0	00538275
1012853	31	37	0.142857	37.1429	1	0	8							1	1	1	1				2600	2320	0	1	1	1	0	0	0	0	0	0	0	0	1012853
894002	28	37	0.714286	37.7143	1	0	6							1		1	1				2500	2330	0	1	1	1	0	0	0	0	0	0	0	0	894002
891739	32	37	0.571429	37.5714	1	0	9		1					1	1	1	1	1			3010	2330	0	1	1	1	0	0	0	0	0	0	0	0	891739
715855	30	37	0.142857	37.1429		0	12						1	1	1	1	0	1			2800	2340	0	1	1	1	0	0	0	0	0	0	0	0	715855
1013657	27	37	0.428571	37.4286	1	0	6									1	1		1		2770	2350	0	1	1	1	0	0	0	0	0	0	0	0	1013657
473533	31	37	0.428571	37.4286	1	0	4				1			1		1	1				2500	2355	0	1	1	1	0	0	0	0	0	0	0	0	473533
817427	26	36	0.571429	36.5714	1	0	7							1		1	1		1		2530	2370	0	1	1	1	0	0	0	0	0	0	0	0	817427
734879	27	36	0.714286	36.7143	1	0	2							1		1	1				2815	2370	0	1	1	1	1	0	1	1	0	0	0	0	734879
790057	35	35	0.857143	35.8571	1	0	14			1						1	1	1	1		2590	2380	0	1	1	1	1	0	1	1	0	0	0	0	790057
755391	33	36	0.857143	36.8571	1	0	6									1	0				2740	2390	0	1	1	1	0	0	0	0	0	0	0	0	755391
00850564	27	37	0.285714	37.2857	1	0	4									1	1				2810	2400	0	1	1	1	0	0	0	0	0	0	0	0	00850564
642284	30	36	0.285714	36.2857	1	0	5	1								1	1				2565	2405	0	1	1	1	0	0	0	0	0	0	0	0	642284
00878920	29	37	0.285714	37.2857	1	0	8			1				1	1		1				2900	2420	0	1	1	1	0	0	0	0	0	0	0	0	00878920
00555921	28	37	0.571429	37.5714	1	0	5							1		1	1				2685	2425	0	1	1	1	0	0	0	0	0	0	0	0	00555921
978995	32	36	0.571429	36.5714	1	0	5					1		1		1	1	1			2760	2440	0	1	1	1	1	0	1	1	0	0	0	0	978995
00880711	30	37	0.857143	37.8571	1	0	5			1						1	1				2920	2440	0	1	1	1	0	0	0	0	0	0	0	0	00880711
562061	30	36	0.428571	36.4286	1	0	6									1	1				3030	2445	0	1	1	1	1	0	1	1	0	0	0	0	562061
872019	37	36	0.857143	36.8571	1	1	5							1		1	0				3150	2450	0	1	1	1	0	0	0	0	0	0	0	0	872019
1003516	30	37	0.285714	37.2857	1	0	8		1					1		1	1			1	3400	2450	0	1	1	1	0	0	0	0	0	0	0	0	1003516
603943	30	35	0.714286	35.7143	1	0	23	1	1			1		1		1	1				2605	2460	0	1	1	1	0	0	0	0	0	0	0	0	603943
00460424	29	37	0.142857	37.1429	1	0	5									1	1				2625	2460	0	1	1	1	0	0	0	0	0	0	0	0	00460424
791374	37	36	0.571429	36.5714	1	0	8									1	1	1			2745	2460	0	1	1	1	0	0	0	0	0	0	0	0	791374
553814	32	35	0.857143	35.8571	1	0	4							1		1	1				2630	2470	0	1	1	1	1	0	1	1	0	0	0	0	553814
785365	32	36	0.428571	36.4286	1	0	6			1				1	1	1	1		1		3165	2470	0	1	1	1	0	0	0	0	0	0	0	0	785365
984451	30	37	0.142857	37.1429	1	0	5							1		1	1				2580	2490	0	1	1	1	0	0	0	0	0	0	0	0	984451
633436	33	37	0.714286	37.7143	1	0	7			1						1	1				2940	2495	0	1	1	1	0	0	0	0	0	0	0	0	633436
00458228	36	36	0.428571	36.4286	1	0	4	1						1		1	1				2375	2500	1	0	1	1	0	0	0	0	0	0	0	0	00458228
00512242	26	36	0.428571	36.4286	1	0	7					1				1	1				2210	2520	1	0	1	1	0	0	0	0	0	0	0	0	00512242
554649	35	36	0.142857	36.1429	1	0	5							1		1	0				1990	2555	1	0	1	1	0	0	0	0	0	0	0	0	554649
486412	34	36	0.714286	36.7143	1	0	3									1	1				2285	2570	1	0	1	1	0	0	0	0	0	0	0	0	486412
00626637	40	37	0.857143	37.8571	1	0	7							1		1	1				2490	2570	1	0	1	1	0	0	0	0	0	0	0	0	00626637
948317	26	36	0.714286	36.7143	1	0	8							1		1	1				2310	2590	1	0	1	1	1	1	2	1	0	0	0	0	948317
1004906	29	37	0.142857	37.1429	1	0	8							1		1	1				2430	2600	1	0	1	1	0	0	0	0	0	0	0	0	1004906
733366	32	34	0.714286	34.7143	1	0	5					1		1		1	1				2215	2610	1	0	1	1	0	0	0	0	0	0	0	0	733366
619148	32	37	0.857143	37.8571	1	0	6							1		1	1				2310	2620	1	0	1	1	0	0	0	0	0	0	0	0	619148
815568	23	36	0.714286	36.7143	1	0	8			1						1	1				2200	2640	1	0	1	1	1	0	1	1	0	0	0	0	815568
00478673	26	34	0.714286	34.7143	1	0	5									1	1				2410	2640	1	0	1	1	1	0	1	1	0	0	0	0	00478673
00652524	32	37	0	37	1	0	6									1	0				2440	2665	1	0	1	1	0	0	0	0	0	0	0	0	00652524
620090	34	37	0	37	1	0	13		1					1		1	1				2300	2670	1	0	1	1	0	0	0	0	0	0	0	0	620090
737697	39	35	0.857143	35.8571	1	0	6							1		1	0				2230	2680	1	0	1	1	0	0	0	0	0	0	0	0	737697
903105	30	36	0.285714	36.2857	1	0	7							1		1	1				2430	2680	1	0	1	1	0	0	0	0	0	0	0	0	903105
1033833	31	35	0.285714	35.2857	1	0	3									1	1				2100	2700	1	0	1	1	0	0	0	0	0	0	0	0	1033833
00897431	26	35	0.285714	35.2857	1	0	15	1		1				1		1	1				2300	2700	1	0	1	1	0	0	0	0	0	0	0	0	00897431
882620	37	37	0.285714	37.2857	1	0	5									1	0		1		2440	2700	1	0	1	1	1	0	1	1	0	0	0	0	882620
00483540	30	37	0	37	1	0	4									1	1	1			2310	2725	1	0	1	1	0	0	0	0	0	0	0	0	00483540
00530124	31	36	0.857143	36.8571	1	0	5			1						1	1			1	1950	2760	1	0	1	1	1	0	1	1	0	0	0	0	00530124
900002	31	36	0.714286	36.7143	1	0	9	1						1			1			1	2090	2770	1	0	1	1	0	1	1	1	0	0	0	0	900002
544741	33	36	0.857143	36.8571	1	0	4							1		1	0				2350	2780	1	0	1	1	0	0	0	0	0	0	0	0	544741
849858	32	37	0.714286	37.7143	1	0	5									1	1				2330	2800	1	0	1	1	0	0	0	0	0	0	0	0	849858
00873366	28	36	0.571429	36.5714	1	0	4			1							1				2460	2800	1	0	1	1	0	0	0	0	0	0	0	0	00873366
942300	30	37	0.428571	37.4286	1	0	8									1	1				2370	2860	1	0	1	1	0	0	0	0	0	0	0	0	942300
00703661	33	35	0.142857	35.1429	1	0	4							1		1	1				2350	2865	1	0	1	1	0	0	0	0	0	0	0	0	00703661
916278	27	36	0.857143	36.8571	1	0	8	1						1		1	1				2350	2870	1	0	1	1	0	0	0	0	0	0	0	0	916278
848679	34	36	0.714286	36.7143	1	0	7			1				1		1	0				2410	2920	1	0	1	1	0	0	0	0	0	0	0	0	848679
756583	31	36	0.142857	36.1429	1	0	7			1				1		1	1			1	2210	2940	1	0	1	1	0	0	0	0	0	0	0	0	756583
450455	33	37	0.857143	37.8571	1	0	10							1		1	1				2370	2945	1	0	1	1	0	0	0	0	0	0	0	0	450455
2770	27	36	0.142857	36.1429	1	0	10			1				1		1					2110	3035	1	0	1	1	0	0	0	0	0	0	0	0	2770
732380	29	35	0.714286	35.7143	1	0	8		1							1	1				2460	3055	1	0	1	1	0	0	0	0	0	0	0	0	732380
00743558	26	31	0.571429	31.5714	1	0	5						1			1	1				1645		1	0	1	1	1	0	1	1	0	0	0	0	00743558
00746886	36	35	0	35	1	0	33			1			1			1	1	1			1980		1	0	1	1	1	0	1	1	0	0	0	0	00746886
00500322	33	30	0.428571	30.4286		0	4		1					1	1		1				1390	1000	1	1	2	1	1	1	2	1	0	0	0	0	00500322
00600678	23	35	0	35	1	0	7							1		1	1			1	2115	1250	1	1	2	1	0	1	1	1	0	0	0	0	00600678
01028354	32	32	0.428571	32.4286	1	0	13									1	1			1	2070	1380	1	1	2	1	1	1	2	1	0	0	0	0	01028354
721816	35	29	0	29	1	0	10		1					1		1	1				1345	1520	1	1	2	1	1	1	2	1	0	0	0	0	721816
564118	31	35	0	35	1	0	9							1	1	2	1			1	2280	1560	1	1	2	1	1	1	2	1	0	0	0	0	564118
00892303	27	35	0	35	1	0	7			1						2	1			1	2300	1570	1	1	2	1	1	1	2	1	0	0	0	0	00892303
711741	29	31	0.285714	31.2857	1	0	7	1								2	1				1730	1620	1	1	2	1	1	1	2	1	0	0	0	0	711741
565765	34	31	0.142857	31.1429	1	1	6			1				1		2	0				1750	1630	1	1	2	1	1	1	2	1	0	0	0	0	565765
498045	34	32	0.428571	32.4286	1	0	19									2	1		1		1505	1680	1	1	2	1	1	1	2	1	0	0	0	0	498045
00830319	27	30	0.428571	30.4286		0	3									2	1				1650	1700	1	1	2	1	1	1	2	1	0	0	0	0	00830319
768620	33	31	0.142857	31.1429	1	0	6	1						1		2	1				1600	1710	1	1	2	1	1	1	2	1	0	0	0	0	768620
00464979	25	32	0.571429	32.5714	1	0	12		1					1		2	1				1670	1750	1	1	2	1	1	1	2	1	0	0	0	0	00464979
00501041	34	34	0.571429	34.5714	1	0	3			1						2	1				2085	1755	1	1	2	1	0	0	0	0	0	0	0	0	00501041
781205	35	36	0.285714	36.2857	1	0	8	1		1				1		2	1				2350	1805	1	1	2	1	1	0	1	1	0	0	0	0	781205
00574891	36	35	0.285714	35.2857	1	1	5							1		2	0				2150	1830	1	1	2	1	0	0	0	0	0	0	0	0	00574891
1017897	37	35	0.428571	35.4286	1	0	3									2	1				2150	1860	1	1	2	1	0	0	0	0	0	0	0	0	1017897
575102	28	34	0.285714	34.2857	1	0	8		1					1		2	1	1			1600	1880	1	1	2	1	1	0	1	1	0	0	0	0	575102
00597791	26	34	0.714286	34.7143	1	0	12		1		1			1	1	2	1				2385	1880	1	1	2	1	0	0	0	0	0	0	0	0	00597791
447565	41	34	0.571429	34.5714		0	1							1		2	0				2050	1885	1	1	2	1	1	1	2	1	0	0	0	0	447565
479353	34	33	0	33	1	0	19	1								2	1				1880	1925	1	1	2	1	1	1	2	1	0	0	0	0	479353
00592801	29	36	0.571429	36.5714	1	0	6							1		2	1				2430	1945	1	1	2	1	0	0	0	0	0	0	0	0	00592801
537899	28	33	0.428571	33.4286	1	0	3							1		2	1				1920	1980	1	1	2	1	1	1	2	1	0	0	0	0	537899
1017697	22	33	0.428571	33.4286	1	0	8									2	1				2230	1980	1	1	2	1	1	1	2	1	0	0	0	0	1017697
00624072	30	34	0.857143	34.8571	1	0	5									2	1				2355	1990	1	1	2	1	0	0	0	0	0	0	0	0	00624072
520887	28	36	0.714286	36.7143	1	0	4					1				2	1				2345	2025	1	1	2	1	0	0	0	0	0	0	0	0	520887
879922	26	35	0.571429	35.5714	1	0	4							1		2	1				2260	2030	1	1	2	1	0	0	0	0	0	0	0	0	879922
856889	31	34	0.142857	34.1429	1	0	6									2	1				2280	2040	1	1	2	1	0	0	0	0	0	0	0	0	856889
00971238	23	33	0.857143	33.8571	1	0	5							1		2	1				2420	2040	1	1	2	1	1	1	2	1	0	0	0	0	00971238
462297	27	34	0.285714	34.2857	1	0	3	1						1		2	1				1775	2045	1	1	2	1	0	0	0	0	0	0	0	0	462297
00611906	30	37	0	37	1	0	5									2	1				2430	2090	1	1	2	1	0	1	1	1	0	0	0	0	00611906
782262	29	34	0.857143	34.8571	1	0	23									2	1				1760	2095	1	1	2	1	1	0	1	1	0	0	0	0	782262
609313	35	33	0.857143	33.8571	1	0	14					1				2	0				1910	2120	1	1	2	1	0	0	0	0	0	0	0	0	609313
00479660	30	34	0.714286	34.7143	1	0	8					1		1		2	1				1730	2140	1	1	2	1	0	0	0	0	0	0	0	0	00479660
999694	38	36	0.142857	36.1429	1	0	5							1		2	1				2230	2180	1	1	2	1	0	0	0	0	0	0	0	0	999694
700012	27	36	0.285714	36.2857	1	0	4									2	1				2275	2210	1	1	2	1	0	0	0	0	0	0	0	0	700012
587260	29	35	0	35	1	0	6		1	1				1		2	1				2060	2215	1	1	2	1	1	1	2	1	0	0	0	0	587260
00863356	34	35	0.714286	35.7143	1	0	4							1		2	0				2250	2220	1	1	2	1	0	0	0	0	0	0	0	0	00863356
893357	31	35	0.142857	35.1429	1	0	4	1		1						2	1				2050	2240	1	1	2	1	1	1	2	1	0	0	0	0	893357
646639	28	33	0	33	1	0	5					1				2	1				2020	2250	1	1	2	1	1	1	2	1	0	0	0	0	646639
00897331	30	36	0.428571	36.4286	1	0	12							1		2	1				2370	2250	1	1	2	1	0	0	0	0	0	0	0	0	00897331
985912	32	36	0.571429	36.5714	1	0	8									2	1				2350	2270	1	1	2	1	0	0	0	0	0	0	0	0	985912
851195	25	35	0.285714	35.2857	1	0	5		1					1		2	1				2020	2300	1	1	2	1	0	0	0	0	0	0	0	0	851195
745178	25	36	0	36	1	0	13			1						2	1				2325	2307	1	1	2	1	0	0	0	0	0	0	0	0	745178
00603981	35	34	0.714286	34.7143	1	0	5	1	1			1		1		2	1				1995	2320	1	1	2	1	0	0	0	0	0	0	0	0	00603981
1005255	35	34	0.571429	34.5714	1	0	7		1	1					1	2	0				2380	2330	1	1	2	1	0	0	0	0	0	0	0	0	1005255
700384	30	35	0	35	1	0	9		1	1		1				2	1				2400	2330	1	1	2	1	0	0	0	0	0	0	0	0	700384
1012912	25	33	0.285714	33.2857	1	0	12							1	1	2	1	1	1		2020	2340	1	1	2	1	1	1	2	1	0	0	0	0	1012912
937466	31	35	0.857143	35.8571	1	0	4	1								1	1				2100	2340	1	1	2	1	0	0	0	0	0	0	0	0	937466
830395	25	35	0.714286	35.7143	1	0	9		1					1		2	1				2440	2340	1	1	2	1	0	0	0	0	0	0	0	0	830395
466094	31	36	0.571429	36.5714	1	0	5							1		2	1				2400	2355	1	1	2	1	0	0	0	0	0	0	0	0	466094
710111	28	35	0.428571	35.4286	1	0	7										1				2290	2370	1	1	2	1	0	0	0	0	0	0	0	0	710111
579974	32	36	0.142857	36.1429	1	0	3	1								2	1				2290	2370	1	1	2	1	0	0	0	0	0	0	0	0	579974
471520	32	36	0.857143	36.8571	1	0	5							1		2	1		1		2420	2380	1	1	2	1	0	0	0	0	0	0	0	0	471520
00591725	28	35	0.714286	35.7143	1	0	4	1	1							2	1				1790	2400	1	1	2	1	0	0	0	0	0	0	0	0	00591725
00653448	30	37	0.428571	37.4286	1	0	7							1		2	1				2435	2400	1	1	2	1	0	0	0	0	0	0	0	0	00653448
00854994	37	36	0.285714	36.2857	1	1	9							1		2	0				2450	2400	1	1	2	1	0	0	0	0	0	0	0	0	00854994
00877707	31	37	0	37	1	0	5									2	1				2470	2400	1	1	2	1	0	0	0	0	0	0	0	0	00877707
919988	31	36	0.857143	36.8571	1	0	5	1								2	1				2480	2400	1	1	2	1	0	0	0	0	0	0	0	0	919988
695459	32	35	0.571429	35.5714	1	0	6			1						2	1				2320	2410	1	1	2	1	1	1	2	1	0	0	0	0	695459
00881268	31	36	0.285714	36.2857	1	0	41			1	1		1			2	1				2440	2410	1	1	2	1	1	1	2	1	0	0	0	0	00881268
1011550	32	37	0.142857	37.1429	1	0	5		1	1						2	1				2310	2430	1	1	2	1	0	0	0	0	0	0	0	0	1011550
00746404	31	36	0	36	1	1	7			1						2	0				2350	2430	1	1	2	1	0	0	0	0	0	0	0	0	00746404
928352	32	34	0.714286	34.7143	1	0	4	1								2	1				2100	2450	1	1	2	1	1	1	2	1	0	0	0	0	928352
00708411	31	34	0.714286	34.7143	1	0	6		1								1				2410	2470	1	1	2	1	0	0	0	0	0	0	0	0	00708411
483645	35	38	0.285714	38.2857	1	0	5							1		2	1				2165	2480	1	1	2	1	0	0	0	0	0	0	0	0	483645
732408	29	35	0.714286	35.7143	1	0	6		1					1		2	1				2285	2481	1	1	2	1	0	0	0	0	0	0	0	0	732408
893975	32	37	0	37	1	0	6							1			1				2460	2490	1	1	2	1	0	0	0	0	0	0	0	0	893975

## Sheet: spontaneous twin pregnancy
inpatient number	mean age	gestational weeks	day	gestational age	Cesarean section	Repeated Cesarean Section	Length of hospitalization	premature rupture of fetal membrane	hypertensive disorder	gestational diabetes mellitus	intrahepatic cholestasis of pregnancies	stillbirth and malformation	maternal anemia	postpartum hemorrhage	Low birth weight	placental accreta	placenta previa	growth discordance	primiparity	bith weight	bith weight	low1	low2			NICU admission				neonatal asphyxia				inpatient number
00977810	36	36	0.428571	36.4286	1	0	4						1						0	2560	2650	0	0	0	0	1	1	2	1	1	0	1	1	00977810
921222	28	36	0.571429	36.5714	1	0	6			1			1						1	2740	2670	0	0	0	0	0	0	0	0	1	0	1	1	921222
811860	22	40	0.285714	40.2857		0	5												1	3010	2770	0	0	0	0	0	0	0	0	1	0	1	1	811860
643760	25	36	0.857143	36.8571	1	0	7		1				1						1	2790	2795	0	0	0	0	0	1	1	1	1	0	1	1	643760
1034185	24	31	0.714286	31.7143		0	3						1		1				0	1760	1460	1	1	2	1	1	1	2	1	1	0	1	1	1034185
1022601	22	31	0.571429	31.5714	1	0	12	1											1	1220	1480	1	1	2	1	1	1	2	1	1	0	1	1	1022601
817371	26	30	0.428571	30.4286		0	3			1					1				1	1385	1640	1	1	2	1	1	1	2	1	1	0	1	1	817371
00506607	25	33	0.714286	33.7143	1	0	10		1				1		2				1	2220	1720	1	1	2	1	1	1	2	1	1	0	1	1	00506607
495474	23	32	0	32		0	4	1					1		2				1	1725	1900	1	1	2	1	1	1	2	1	1	0	1	1	495474
962020	27	33	0.285714	33.2857	1	0	25				1				2				1	1850	1980	1	1	2	1	1	1	2	1	1	0	1	1	962020
986807	26	34	0.142857	34.1429	1	0	8		1			1		1	2				1	2380	2000	1	1	2	1	1	0	1	1	1	0	1	1	986807
00696038	31	34	0.428571	34.4286	1	0	40						1	1	2		1		1	2095	2300	1	1	2	1	0	0	0	0	1	0	1	1	00696038
604745	40	34	0.428571	34.4286	1	0	8		1				1		1				0	1310	2330	1	1	2	1	1	1	2	1	1	0	1	1	604745
497339	25	34	0.428571	34.4286	1	0	4	1					1		2				1	2110	2400	1	1	2	1	1	0	1	1	1	0	1	1	497339
985122	25	37	0	37	1	0	12						1		1				1	2580	2420	0	1	1	1	0	0	0	0	1	1	2	1	985122
775219	32	35	0.428571	35.4286	1	1	12				1		1		2				0	2355	2065	1	1	2	1	0	0	0	0	1	1	2	1	775219
00975127	31	37	0	37	1	0	34						1						0	2500	2520	0	0	0	0	0	0	0	0	0	0	0	0	00975127
891496	27	36	0.714286	36.7143	1	0	5												1	2600	2550	0	0	0	0	0	0	0	0	0	0	0	0	891496
969929	34	37	0.142857	37.1429	1	0	6						1						0	2660	2560	0	0	0	0	0	0	0	0	0	0	0	0	969929
00539115	30	36	0.428571	36.4286	1	0	6												1	2610	2565	0	0	0	0	1	1	2	1	0	0	0	0	00539115
705240	27	36	0.285714	36.2857	1	0	6			1									1	2680	2580	0	0	0	0	0	0	0	0	0	0	0	0	705240
00805283	26	37	0.857143	37.8571	1	0	4												1	3025	2585	0	0	0	0	0	0	0	0	0	0	0	0	00805283
00593205	24	36	0.714286	36.7143	1	0	5												1	2555	2600	0	0	0	0	0	0	0	0	0	0	0	0	00593205
449574	31	38	0.571429	38.5714	1	0	6												1	2570	2600	0	0	0	0	0	0	0	0	0	0	0	0	449574
836613	24	36	0.857143	36.8571	1	0	7			1			1						1	2590	2600	0	0	0	0	0	0	0	0	0	0	0	0	836613
728928	31	37	0.428571	37.4286	1	0	6			1									1	2720	2600	0	0	0	0	0	0	0	0	0	0	0	0	728928
00598868	30	37	0.285714	37.2857	1	0	4						1						1	2750	2600	0	0	0	0	0	0	0	0	0	0	0	0	00598868
00453946	35	37	0.285714	37.2857	1	0	4	1					1						0	2510	2610	0	0	0	0	0	0	0	0	0	0	0	0	00453946
00858069	29	36	0.857143	36.8571	1	0	8				1		1						1	2600	2610	0	0	0	0	0	0	0	0	0	0	0	0	00858069
00737499	25	36	0.714286	36.7143	1	0	4												1	2585	2620	0	0	0	0	0	0	0	0	0	0	0	0	00737499
985341	26	36	0.285714	36.2857		0	7	1			1		1						1	2590	2650	0	0	0	0	0	0	0	0	0	0	0	0	985341
00818306	29	38	0	38	1	0	5												1	2630	2650	0	0	0	0	0	0	0	0	0	0	0	0	00818306
00555271	28	36	0.857143	36.8571	1	0	4			1			1						1	2780	2650	0	0	0	0	0	0	0	0	0	0	0	0	00555271
00599043	31	37	0.714286	37.7143	1	0	5			1									1	3155	2655	0	0	0	0	0	0	0	0	0	0	0	0	00599043
557170	25	36	0.857143	36.8571	1	0	7						1						0	2870	2660	0	0	0	0	0	0	0	0	0	0	0	0	557170
597438	31	37	0.571429	37.5714	1	0	3						1						0	2600	2670	0	0	0	0	0	0	0	0	0	0	0	0	597438
00921330	24	36	0.714286	36.7143	1	0	6												1	2820	2670	0	0	0	0	0	0	0	0	0	0	0	0	00921330
00570611	29	38	0	38	1	0	6						1						1	2530	2690	0	0	0	0	0	0	0	0	0	0	0	0	00570611
993830	22	36	0.857143	36.8571	1	1	4												0	2550	2690	0	0	0	0	0	0	0	0	0	0	0	0	993830
00521403	40	38	0.428571	38.4286	1	0	6						1						0	2645	2690	0	0	0	0	0	0	0	0	0	0	0	0	00521403
1006123	37	36	0.428571	36.4286	1	0	6			1									0	2690	2690	0	0	0	0	1	1	2	1	0	0	0	0	1006123
1031954	28	37	0.428571	37.4286	1	0	5			1									1	2820	2690	0	0	0	0	0	0	0	0	0	0	0	0	1031954
644480	28	37	0.285714	37.2857	1	0	5						1						0	2940	2710	0	0	0	0	0	0	0	0	0	0	0	0	644480
633332	26	37	0.285714	37.2857	1	0	5						1	1					1	2910	2715	0	0	0	0	0	1	1	1	0	0	0	0	633332
558431	27	36	0.285714	36.2857	1	0	4						1						1	2590	2760	0	0	0	0	1	1	2	1	0	0	0	0	558431
879821	28	36	0.857143	36.8571	1	0	4												0	2620	2760	0	0	0	0	0	0	0	0	0	0	0	0	879821
00785868	23	37	0.428571	37.4286	1	0	6	1					1	1					1	2785	2760	0	0	0	0	0	0	0	0	0	0	0	0	00785868
928120	24	37	0	37	1	0	20						1						1	2670	2770	0	0	0	0	0	0	0	0	0	0	0	0	928120
842074	33	38	0.142857	38.1429	1	0	5						1						1	2530	2780	0	0	0	0	1	0	1	1	0	0	0	0	842074
675542	28	36	0.857143	36.8571	1	0	9												1	2580	2790	0	0	0	0	0	1	1	1	0	0	0	0	675542
927486	27	37	0	37	1	1	6												0	2610	2790	0	0	0	0	0	0	0	0	0	0	0	0	927486
770226	27	38	0.285714	38.2857	1	0	4												0	2925	2805	0	0	0	0	0	0	0	0	0	0	0	0	770226
616356	27	37	0.285714	37.2857	1	0	4					1							1	2610	2810	0	0	0	0	1	0	1	1	0	0	0	0	616356
00913224	27	37	0	37	1	0	5												0	3050	2830	0	0	0	0	0	0	0	0	0	0	0	0	00913224
837792	26	37	0.857143	37.8571	1	0	9			1									1	2900	2850	0	0	0	0	0	0	0	0	0	0	0	0	837792
941715	34	38	0.142857	38.1429	1	0	7												0	3240	2860	0	0	0	0	0	0	0	0	0	0	0	0	941715
1000793	25	38	0.714286	38.7143	1	0	9						1						0	3420	2860	0	0	0	0	0	0	0	0	0	0	0	0	1000793
711519	26	38	0	38	1	0	4												1	2710	2870	0	0	0	0	0	0	0	0	0	0	0	0	711519
00723081	26	38	0.571429	38.5714	1	0	7		1										1	2845	2885	0	0	0	0	0	0	0	0	0	0	0	0	00723081
00510312	22	37	0	37	1	0	4						1						1	2860	2885	0	0	0	0	0	0	0	0	0	0	0	0	00510312
970253	25	37	0.714286	37.7143	1	0	6												1	2520	2890	0	0	0	0	0	0	0	0	0	0	0	0	970253
621852	30	37	0.714286	37.7143	1	0	4						1						0	3220	2890	0	0	0	0	0	0	0	0	0	0	0	0	621852
00491066	22	37	0.142857	37.1429	1	0	5						1						1	2910	2895	0	0	0	0	0	0	0	0	0	0	0	0	00491066
935048	26	37	0.714286	37.7143	1	1	5												0	2620	2920	0	0	0	0	0	0	0	0	0	0	0	0	935048
550568	27	35	0	35	1	0	5		1				1						1	2920	2920	0	0	0	0	1	0	1	1	0	0	0	0	550568
1014965	30	38	0.714286	38.7143	1	0	10			1						1	1		0	2810	2930	0	0	0	0	0	0	0	0	0	0	0	0	1014965
993654	29	37	0.285714	37.2857	1	0	5							1					1	3030	2930	0	0	0	0	0	0	0	0	0	0	0	0	993654
632649	32	37	0.714286	37.7143	1	0	8						1						0	3110	2930	0	0	0	0	0	0	0	0	0	0	0	0	632649
745878	30	37	0.142857	37.1429	1	0	4												1	2670	2940	0	0	0	0	0	0	0	0	0	0	0	0	745878
676351	18	37	0.714286	37.7143	1	0	5						1						1	3140	2960	0	0	0	0	0	0	0	0	0	0	0	0	676351
526621	32	37	0.571429	37.5714	1	0	7			1			1						0	2665	2970	0	0	0	0	0	0	0	0	0	0	0	0	526621
758848	28	37	0.428571	37.4286	1	0	7						1						1	2520	3020	0	0	0	0	0	0	0	0	0	0	0	0	758848
00832074	30	37	0.571429	37.5714		0	3												0	3160	3030	0	0	0	0	0	0	0	0	0	0	0	0	00832074
2270	30	38	0.857143	38.8571	1		5						1							2730	3045	0	0	0	0	0	0	0	0	0	0	0	0	2270
00769062	26	37	0.142857	37.1429	1	0	5												1	3020	3065	0	0	0	0	0	0	0	0	0	0	0	0	00769062
754068	32	36	0.571429	36.5714	1	0	5						1						1	2595	3080	0	0	0	0	0	0	0	0	0	0	0	0	754068
736797	27	37	0.285714	37.2857	1	0	4												0	2810	3110	0	0	0	0	0	0	0	0	0	0	0	0	736797
00455322	29	37	0	37	1	0	7						1						1	2920	3120	0	0	0	0	0	0	0	0	0	0	0	0	00455322
832269	24	37	0.428571	37.4286	1	0	5												0	3300	3140	0	0	0	0	0	0	0	0	0	0	0	0	832269
700242	27	37	0	37	1	0	12						1						0	2585	3150	0	0	0	0	1	0	1	1	0	0	0	0	700242
00593989	32	34	0.857143	34.8571	1	1	7		1		1								0	3070	3180	0	0	0	0	0	0	0	0	0	0	0	0	00593989
00730380	26	37	0.428571	37.4286	1	0	7						1						1	3125	3190	0	0	0	0	0	0	0	0	0	0	0	0	00730380
00457838	25	38	0.285714	38.2857		0	2		1				1						0	2915	3200	0	0	0	0	0	0	0	0	0	0	0	0	00457838
949884	30	37	0.857143	37.8571	1	0	4												0	2900	3230	0	0	0	0	0	0	0	0	0	0	0	0	949884
533683	29	38	0.428571	38.4286	1	1	5												0	2725	3240	0	0	0	0	0	0	0	0	0	0	0	0	533683
724670	25	37	0.714286	37.7143	1	0	6												0	2680	3245	0	0	0	0	0	0	0	0	0	0	0	0	724670
00513287	28	37	0	37	1	0	12												1	2920	3265	0	0	0	0	0	0	0	0	0	0	0	0	00513287
456047	29	37	0	37	1	0	8						1	1			1		0	2655	3270	0	0	0	0	0	0	0	0	0	0	0	0	456047
00436088	39	36	0.714286	36.7143	1	0	4	1					1						0	2620	3320	0	0	0	0	0	1	1	1	0	0	0	0	00436088
673082	31	37	0.142857	37.1429	1	0	6												1	3315	3340	0	0	0	0	0	0	0	0	0	0	0	0	673082
1013176	27	37	0.285714	37.2857	1	1	5						1						0	2900	3420	0	0	0	0	0	0	0	0	0	0	0	0	1013176
00738298	31	36	0.142857	36.1429	1	0	17												1	3060	3560	0	0	0	0	0	0	0	0	0	0	0	0	00738298
00849201	34	36	0.571429	36.5714	1	1	4												0	3580	3580	0	0	0	0	0	0	0	0	0	0	0	0	00849201
891803	28	38	0.857143	38.8571	1	0	6												0	2850	3600	0	0	0	0	0	0	0	0	0	0	0	0	891803
00871471	32	34	0.571429	34.5714	1	0	3		1									1	1	2690	1320	0	1	1	1	1	1	2	1	0	0	0	0	00871471
584379	25	37	0.285714	37.2857	1	0	13			1			1		1			1	1	2550	1940	0	1	1	1	0	0	0	0	0	0	0	0	584379
975145	27	36	0	36	1	0	11								1			1	1	2610	1940	0	1	1	1	0	0	0	0	0	0	0	0	975145
680821	33	36	0	36	1	1	10		1						1				0	2591	2060	0	1	1	1	0	0	0	0	0	0	0	0	680821
560442	35	35	0.714286	35.7143	1	0	14								1				1	2545	2140	0	1	1	1	0	0	0	0	0	0	0	0	560442
831232	29	38	0.142857	38.1429	1	0	4								1				1	2640	2190	0	1	1	1	0	0	0	0	0	0	0	0	831232
774373	25	37	0.428571	37.4286	1	0	5								1				1	2550	2250	0	1	1	1	0	0	0	0	0	0	0	0	774373
688505	26	37	0.428571	37.4286	1	0	7						1	1	1				1	2730	2275	0	1	1	1	0	0	0	0	0	0	0	0	688505
745794	30	36	0.714286	36.7143	1	0	5								1				1	2990	2285	0	1	1	1	0	0	0	0	0	0	0	0	745794
632732	34	36	0.571429	36.5714	1	0	9								1				1	2590	2290	0	1	1	1	0	0	0	0	0	0	0	0	632732
958517	22	36	0.571429	36.5714	1	0	8		1						1				1	2540	2340	0	1	1	1	1	1	2	1	0	0	0	0	958517
566188	31	37	0	37	1	0	4						1		1	1			1	2675	2340	0	1	1	1	0	0	0	0	0	0	0	0	566188
00593184	31	35	0.857143	35.8571	1	0	4						1		1				1	2735	2340	0	1	1	1	0	0	0	0	0	0	0	0	00593184
00695954	22	37	0	37	1	0	5						1						1	2800	2340	0	1	1	1	0	0	0	0	0	0	0	0	00695954
842020	29	37	0.857143	37.8571	1	0	5			1			1		1				1	2830	2340	0	1	1	1	0	0	0	0	0	0	0	0	842020
863436	29	35	0.285714	35.2857		0	3								1				0	2750	2350	0	1	1	1	0	0	0	0	0	0	0	0	863436
551840	26	36	0.714286	36.7143	1	0	4						1		1				1	2770	2350	0	1	1	1	0	0	0	0	0	0	0	0	551840
578752	27	36	0.714286	36.7143	1	0	5						1		1				1	2500	2370	0	1	1	1	0	0	0	0	0	0	0	0	578752
817370	34	34	0	34	1	0	4			1					1				1	2740	2380	0	1	1	1	0	0	0	0	0	0	0	0	817370
931090	32	38	0.285714	38.2857	1	0	5			1			1						0	2900	2400	0	1	1	1	0	0	0	0	0	0	0	0	931090
870383	33	37	0	37	1	0	6								1				0	2580	2410	0	1	1	1	0	0	0	0	0	0	0	0	870383
00796136	27	38	0.285714	38.2857	1	0	5								1				1	3135	2420	0	1	1	1	0	0	0	0	0	0	0	0	00796136
936388	26	37	0.428571	37.4286	1	0	6			1					1				1	2540	2430	0	1	1	1	0	0	0	0	0	0	0	0	936388
00604364	30	36	0.714286	36.7143	1	0	6						1		1				1	2620	2430	0	1	1	1	0	0	0	0	0	0	0	0	00604364
00640060	27	36	0.285714	36.2857	1	0	6						1		1				0	2580	2434	0	1	1	1	0	0	0	0	0	0	0	0	00640060
00538655	33	36	0.571429	36.5714	1	1	4								1				0	2540	2445	0	1	1	1	0	0	0	0	0	0	0	0	00538655
535073	32	36	0.142857	36.1429	1	1	9						1		1				0	2650	2451	0	1	1	1	0	0	0	0	0	0	0	0	535073
00813921	31	34	0.857143	34.8571	1	0	28				1		1		1	1			0	2600	2460	0	1	1	1	0	0	0	0	0	0	0	0	00813921
00552366	28	37	0.285714	37.2857	1	0	5			1			1		1				1	2685	2460	0	1	1	1	0	0	0	0	0	0	0	0	00552366
00724264	25	37	0.285714	37.2857	1	1	6								1				0	2850	2460	0	1	1	1	0	0	0	0	0	0	0	0	00724264
466086	31	36	0.571429	36.5714	1	0	6						1	1	1				1	2655	2465	0	1	1	1	0	0	0	0	0	0	0	0	466086
619492	27	36	0.142857	36.1429	1	0	5								1				1	2620	2470	0	1	1	1	0	0	0	0	0	0	0	0	619492
00770365	37	37	0	37	1	0	4	1		1					1				1	2800	2470	0	1	1	1	0	0	0	0	0	0	0	0	00770365
622219	30	37	0.714286	37.7143	1	1	8								1				0	2855	2470	0	1	1	1	0	0	0	0	0	0	0	0	622219
675597	26	37	0.571429	37.5714	1	0	11						1		1				1	2735	2475	0	1	1	1	0	0	0	0	0	0	0	0	675597
861632	25	38	0.142857	38.1429	1	0	7								1				1	2700	2480	0	1	1	1	0	0	0	0	0	0	0	0	861632
00937359	25	37	0.142857	37.1429	1	0	6						1		1				1	2920	2480	0	1	1	1	1	0	1	1	0	0	0	0	00937359
699875	26	37	0.714286	37.7143	1	0	5						1		1				0	2975	2485	0	1	1	1	0	0	0	0	0	0	0	0	699875
646963	29	36	0.428571	36.4286	1	0	11	1							1				0	2595	2490	0	1	1	1	0	0	0	0	0	0	0	0	646963
577010	29	37	0	37	1	1	6						1		1				0	2325	2500	1	0	1	1	0	0	0	0	0	0	0	0	577010
00923024	23	36	0.857143	36.8571	1	0	9		1						1				1	2350	2500	1	0	1	1	0	0	0	0	0	0	0	0	00923024
726151	26	34	0.714286	34.7143	1	0	4						1		1				1	2490	2515	1	0	1	1	0	1	1	1	0	0	0	0	726151
657481	28	37	0.571429	37.5714	1	0	7						1		1				1	2195	2525	1	0	1	1	0	0	0	0	0	0	0	0	657481
597675	29	34	0	34	1	1	5						1		1				0	2195	2550	1	0	1	1	1	0	1	1	0	0	0	0	597675
00490768	34	35	0.285714	35.2857	1	0	6								1				1	2420	2550	1	0	1	1	0	0	0	0	0	0	0	0	00490768
507745	31	37	0.285714	37.2857	1	0	4								1				1	2240	2555	1	0	1	1	0	0	0	0	0	0	0	0	507745
957564	29	34	0.285714	34.2857	1	0	7								1				1	2480	2590	1	0	1	1	0	0	0	0	0	0	0	0	957564
674904	38	38	0.571429	38.5714	1	1	5			1					1				0	2270	2600	1	0	1	1	0	0	0	0	0	0	0	0	674904
792744	32	37	0.857143	37.8571	1	0	4						1		1				0	2350	2630	1	0	1	1	0	0	0	0	0	0	0	0	792744
00602134	40	37	0.571429	37.5714	1	1	7			1			1		1			1	0	1855	2655	1	0	1	1	1	0	1	1	0	0	0	0	00602134
822803	22	37	0.285714	37.2857	1	0	4								1				1	2460	2670	1	0	1	1	0	0	0	0	0	0	0	0	822803
916061	23	37	0.285714	37.2857	1	0	7								1				1	2260	2690	1	0	1	1	0	0	0	0	0	0	0	0	916061
770110	27	38	0	38	1	0	7			1					1				1	2200	2700	1	0	1	1	0	0	0	0	0	0	0	0	770110
608583	29	35	0	35	1	0	10						1		1				0	2495	2815	1	0	1	1	0	0	0	0	0	0	0	0	608583
685844	35	37	0	37	1	1	5			1	1				1				0	2365	2860	1	0	1	1	0	0	0	0	0	0	0	0	685844
917236	29	37	0	37	1	1	10												0	2400	2870	1	0	1	1	0	0	0	0	0	0	0	0	917236
597342	26	36	0.142857	36.1429		0	1	1							1				0	2445	2950	1	0	1	1	0	0	0	0	0	0	0	0	597342
960569	25	37	0.857143	37.8571	1	0	4						1	1				1	1	2280	3000	1	0	1	1	0	0	0	0	0	0	0	0	960569
00500892	30	37	0.428571	37.4286	1	0	6								1				1	2430	3000	1	0	1	1	0	0	0	0	0	0	0	0	00500892
00463571	39	37	0.142857	37.1429	1	0	5						1		1			1	0	2180	3030	1	0	1	1	0	0	0	0	0	0	0	0	00463571
598867	36	38	0.142857	38.1429	1	0	4						1		1				0	2375	3035	1	0	1	1	0	0	0	0	0	0	0	0	598867
469199	34	36	0.714286	36.7143	1	1	15		1				1		1			1	0	1555	3105	1	0	1	1	1	0	1	1	0	0	0	0	469199
973761	30	37	0	37	1	0	5						1					1	1	2410	3210	1	0	1	1	0	0	0	0	0	0	0	0	973761
464528	27	38	0.857143	38.8571		0	4						1	1	1			1	0	2370	3575	1	0	1	1	1	0	1	1	0	0	0	0	464528
490888	22	34	0.857143	34.8571	1	0	6					1			1				1	2310		1	0	1	1	0	0	0	0	0	0	0	0	490888
801197	26	34	0	34	1	0	9		1		1				1			1	1	1770	890	1	1	2	1	1	1	2	1	0	0	0	0	801197
900644	33	31	0.571429	31.5714	1	0	23		1				1						1	1400	1220	1	1	2	1	1	1	2	1	0	0	0	0	900644
00557940	29	35	0.285714	35.2857	1	0	6			1					2			1	1	2250	1580	1	1	2	1	1	1	2	1	0	0	0	0	00557940
844853	25	32	0.428571	32.4286		0	2						1		2				0	1920	1590	1	1	2	1	1	1	2	1	0	0	0	0	844853
523233	28	31	0.857143	31.8571		0	3	1					1		2				1	1925	1590	1	1	2	1	0	0	0	0	0	0	0	0	523233
453041	40	32	0.428571	32.4286	1	0	1	1	1				1		2				0	1900	1730	1	1	2	1	0	1	1	1	0	0	0	0	453041
527016	28	33	0.857143	33.8571	1	0	6	1							2				1	1950	1730	1	1	2	1	1	1	2	1	0	0	0	0	527016
00435703	31	34	0.428571	34.4286		0	1	1					1		2				1	1975	1740	1	1	2	1	1	1	2	1	0	0	0	0	00435703
00831804	33	35	0.285714	35.2857	1	0	4								2			1	1	2300	1750	1	1	2	1	0	1	1	1	0	0	0	0	00831804
00579463	27	33	0.714286	33.7143	1	0	22	1					1		2				1	1680	1780	1	1	2	1	1	1	2	1	0	0	0	0	00579463
466155	26	32	0.428571	32.4286	1	0	13				1		1		2				1	2120	1780	1	1	2	1	1	1	2	1	0	0	0	0	466155
00562949	25	33	0.285714	33.2857	1	0	4		1				1		2				0	1710	1800	1	1	2	1	1	1	2	1	0	0	0	0	00562949
00502151	29	35	0	35	1	0	3	1					1		2				0	2255	1840	1	1	2	1	0	1	1	1	0	0	0	0	00502151
00469993	23	33	0.857143	33.8571	1	0	6		1		1		1		2				1	1910	1900	1	1	2	1	1	1	2	1	0	0	0	0	00469993
965073	20	37	0.857143	37.8571	1	0	6		1				1		2				0	1980	1910	1	1	2	1	0	0	0	0	0	0	0	0	965073
842227	32	33	0	33	1	1	7						1	1	2		1		0	1840	1930	1	1	2	1	1	1	2	1	0	0	0	0	842227
968455	25	35	0	35	1	1	17		1						2				0	2240	1930	1	1	2	1	0	1	1	1	0	0	0	0	968455
854684	25	35	0	35	1	0	9			1					2				1	1900	1950	1	1	2	1	0	0	0	0	0	0	0	0	854684
1004537	34	34	0	34		0	14	1						1	2				1	2100	1960	1	1	2	1	1	1	2	1	0	0	0	0	1004537
464789	22	34	0.857143	34.8571	1	0	5	1					1		2				1	2040	2000	1	1	2	1	0	0	0	0	0	0	0	0	464789
560752	35	37	0.142857	37.1429	1	0	20			1			1		2	1			1	2320	2000	1	1	2	1	0	0	0	0	0	0	0	0	560752
591239	24	34	0.142857	34.1429	1	0	4								2				1	2340	2005	1	1	2	1	0	0	0	0	0	0	0	0	591239
822960	25	34	0.285714	34.2857	1	0	5								2				1	1900	2010	1	1	2	1	1	1	2	1	0	0	0	0	822960
00844505	27	36	0.714286	36.7143	1	0	5			1					2				1	2330	2040	1	1	2	1	0	0	0	0	0	0	0	0	00844505
987730	35	35	0	35	1	0	16			1					2		1		0	2390	2050	1	1	2	1	0	0	0	0	0	0	0	0	987730
531425	32	32	0	32		0	5	1					1	1	2				0	1815	2080	1	1	2	1	1	1	2	1	0	0	0	0	531425
946711	29	36	0.142857	36.1429	1	0	5								2				0	2110	2080	1	1	2	1	0	0	0	0	0	0	0	0	946711
461367	32	35	0.142857	35.1429	1	0	10								2	1			1	2030	2115	1	1	2	1	0	0	0	0	0	0	0	0	461367
488141	28	36	0.857143	36.8571	1	0	6								1				1	2320	2130	1	1	2	1	0	0	0	0	0	0	0	0	488141
00582514	23	35	0.857143	35.8571	1	0	8	1					1	1	2	1			1	1970	2140	1	1	2	1	1	0	1	1	0	0	0	0	00582514
929804	20	36	0	36	1	0	6						1		2				1	1910	2160	1	1	2	1	0	0	0	0	0	0	0	0	929804
00597598	28	35	0.285714	35.2857	1	0	4								2				1	2030	2160	1	1	2	1	1	1	2	1	0	0	0	0	00597598
699185	28	36	0	36	1	0	3			1			1		2				0	1930	2170	1	1	2	1	0	0	0	0	0	0	0	0	699185
00587774	27	33	0.571429	33.5714	1	0	3	1					1		1				1	1755	2180	1	1	2	1	1	1	2	1	0	0	0	0	00587774
795218	34	38	0.428571	38.4286	1	0	5						1		2				0	2335	2180	1	1	2	1	0	0	0	0	0	0	0	0	795218
00547870	33	34	0.428571	34.4286	1	0	4		1				1		2				1	2430	2200	1	1	2	1	0	0	0	0	0	0	0	0	00547870
00837802	33	37	0	37	1	0	16						1		2			1	0	1630	2210	1	1	2	1	1	0	1	1	0	0	0	0	00837802
605857	26	36	0.142857	36.1429	1	0	4						1		2				1	2450	2210	1	1	2	1	0	0	0	0	0	0	0	0	605857
497136	31	33	0.142857	33.1429	1	0	4	1							2				1	1850	2220	1	1	2	1	1	1	2	1	0	0	0	0	497136
00478233	23	38	0.714286	38.7143	1	0	5						1		2				1	2000	2220	1	1	2	1	0	0	0	0	0	0	0	0	00478233
854179	31	35	0.714286	35.7143	1	1	7		1						2				0	2330	2220	1	1	2	1	0	0	0	0	0	0	0	0	854179
925790	23	37	0	37	1	0	10								2				1	2360	2300	1	1	2	1	0	0	0	0	0	0	0	0	925790
818181	25	37	0.142857	37.1429	1	0	7								2				1	2280	2310	1	1	2	1	0	0	0	0	0	0	0	0	818181
596676	26	35	0.714286	35.7143	1	0	3	1					1		2				0	2000	2320	1	1	2	1	0	0	0	0	0	0	0	0	596676
801472	32	36	0.285714	36.2857	1	0	5								2				1	2135	2320	1	1	2	1	0	0	0	0	0	0	0	0	801472
442973	29	34	0.571429	34.5714	1	0	6		1				1		2				0	1910	2330	1	1	2	1	0	0	0	0	0	0	0	0	442973
967866	21	35	0.428571	35.4286	1	0	7		1						2				0	1960	2330	1	1	2	1	1	1	2	1	0	0	0	0	967866
1008945	29	37	0.857143	37.8571	1	0	6								2				1	2440	2330	1	1	2	1	0	0	0	0	0	0	0	0	1008945
502698	22	34	0.714286	34.7143	1	0	11												1	2370	2340	1	1	2	1	0	0	0	0	0	0	0	0	502698
790458	36	35	0.142857	35.1429	1	0	8		1				1	1	2				1	2450	2340	1	1	2	1	0	0	0	0	0	0	0	0	790458
00439553	34	38	0.142857	38.1429	1	0	10								2				1	2315	2360	1	1	2	1	0	0	0	0	0	0	0	0	00439553
940151	23	36	0.857143	36.8571	1	0	7			1			1		2				1	2460	2380	1	1	2	1	0	0	0	0	0	0	0	0	940151
663964	29	36	0.571429	36.5714	1	0	5						1		2				1	2160	2400	1	1	2	1	0	0	0	0	0	0	0	0	663964
928548	24	37	0.142857	37.1429	1	0	12			1					2				1	2230	2400	1	1	2	1	0	0	0	0	0	0	0	0	928548
919331	25	37	0.142857	37.1429	1	1	5						1		2	1			0	2430	2400	1	1	2	1	0	0	0	0	0	0	0	0	919331
00859691	39	37	0	37	1	0	12		1				1	1	2				1	2450	2400	1	1	2	1	0	0	0	0	0	0	0	0	00859691
00623024	25	37	0	37	1	0	4								2				1	2340	2440	1	1	2	1	0	0	0	0	0	0	0	0	00623024
681352	27	36	0	36	1	0	5			1					2			1	1	1630	2445	1	1	2	1	1	0	1	1	0	0	0	0	681352
1014575	29	37	0.571429	37.5714	1	0	8								2				1	2340	2470	1	1	2	1	0	0	0	0	0	0	0	0	1014575
506981	33	37	0.428571	37.4286	1	0	3								2				0	2375	2480	1	1	2	1	0	0	0	0	0	0	0	0	506981
00468629	22	35	0.857143	35.8571	1	0	10		1		1		1		2			1	1	1975	2485	1	1	2	1	0	0	0	0	0	0	0	0	00468629
00842489	25	36	0.428571	36.4286	1	0	5								2				1	2280	2490	1	1	2	1	0	0	0	0	0	0	0	0	00842489
